# Supplementary material for: Complex system modeling reveals oxalate homeostasis is driven by diverse oxalate-degrading bacteria
Source: eLife. 2025 May 1;14:RP104121. doi: 10.7554/eLife.104121 (PMC12045624; doi:10.7554/eLife.104121)
Supplement: Supplementary file 1. [file elife-104121-supp1.xlsx]

## Sheet: Sheet1
Table S1. Composition of the diets used in the diet trials.
Ingredients	0% oxalate (g/Kg)	1.5% oxalate (g/Kg)	3% oxalate (g/Kg)
Casein	200	200	200
L-Cysteine	3	3	3
Corn Starch	285.5	NA	NA
Maltodextrin	120	120	120
Sucrose	100	185.4	185.4
Anhydrous Milkfat	NA	200	200
Soybean Oil	70	70	70
Cellulose	150	150	150
Mineral Mix	42	42	42
Vitamin Mix	12	12	12
Choline Bitartrate	2.5	2.5	2.5
TBHQ, antioxidant	0.014	0.054	0.054
Sodium Oxalate	0	15	30
