# Supplementary material for: Complex system modeling reveals oxalate homeostasis is driven by diverse oxalate-degrading bacteria
Source: eLife. 2025 May 1;14:RP104121. doi: 10.7554/eLife.104121 (PMC12045624; doi:10.7554/eLife.104121)
Supplement: Supplementary file 6. [file elife-104121-supp6.xlsx]

## Sheet: Sheet1
Table S6. Media recipe used to test the impact of substrates on oxalate metabolism.
Component	Amount/L	Concentration	Comments
Tryptone Peptone	2 g	0.002
Yeast Extract	1 g	0.001
Meat Extract	5 g	0.005
KH2PO4	100 mL	100 mM	1M stock solution pH 7.2
NaHCO3	0.4 g	4.8 mM
NaCl2	0.08 g	1.37 mM
CaCl2	1 mL	0.008	0.8g/100mL stock
Vitamin K (menadione)	1 mL	5.8 mM	1 mg/mL stock solution
FeSO4	1 mL	1.44 mM	0.4 mg FeSO4/mL stock solution
Histidine Hematin Solution	1 mL	0.001	1.2 mg hematin/mL in 0.2M histidine
Tween 80	2 mL	0.0005	25% stock solution
Aspartic acid	0.02g
Mannose	0.9g
Galactose	1.8g
Sodium acetate	6g	0.006
Sodium formate	4g	0.004
Isovaleric acid	0.1 mL	1 mM	Must be added in fume hood. Keep media, gloves, and tips in fume hood after addition for at least 5 minutes.
Propionic acid	2 mL	8 mM	Must be added in fume hood. Keep media, gloves, and tips in fume hood after addition for at least 5 minutes.
Butyric acid	2 mL	4 mM	Must be added in fume hood. Keep media, gloves, and tips in fume hood after addition for at least 5 minutes.
Resazurin	4 mL	4 mM	0.25 mg/mL stock solution
Noble Agar	12 g	0.012	Only add agar if making plates. If broth, omit.
pH to 7
Add DI water to 910ml
Autoclave
Prepare glucose, cellobiose, maltose, fructose, sucrose, and methyl-x compounds as below
Move media to anaerobic chamber and add remaining components
D-glucose	0.4 g	2.2 mM	Add to 10ml DI H2O and filter sterilize
Cellobiose	1 g	2.9 mM	Add to 20ml DI H2O and filter sterilize
Maltose	1 g	2.8 mM	Add to 10ml DI H2O and filter sterilize
Fructose	1 g	2.2 mM	Add to 10ml DI H2O and filter sterilize
Sucrose	1.71g		Add to 10ml DI H2O and filter sterilize
Methylvaleric acid	561ul		Combine with methyl butyric and filter sterilize
Methylbutyric acid	517ul
sodium sulfate	2g	0.002	Add to 10ml DI H2O and filter sterilize in anearobic chamber
L-cysteine	0.5 g	3.2 mM	Add to 10ml DI H2O and filter sterilize in anearobic chamber
MgSO4-7H20	1ml	0.008 mM	Stock 0.2g/100ml & autoclave
ATCC Vitamin Mix	10 mL	0.01
ATCC Trace Mineral Mix	10 mL	0.01
**Let media sit in anaerobic chamber for at least 24hrs to be fully reduced before inoculation
