# Supplementary material for: Complex system modeling reveals oxalate homeostasis is driven by diverse oxalate-degrading bacteria
Source: eLife. 2025 May 1;14:RP104121. doi: 10.7554/eLife.104121 (PMC12045624; doi:10.7554/eLife.104121)
Supplement: Supplementary file 7. [file elife-104121-supp7.xlsx]

## Sheet: Sheet1
Table S7. Media recipe used to test the proportion of the NALB community that can utilize substrates as sole carbon and energy sources.
Component	Amount/L	Concentration
KH2PO4	100 mL	100 mM
NaHCO3	0.4 g	4.8 mM
NaCl2	0.08 g	1.37 mM
CaCl2	1 mL	0.008	0.8g/100mL stock; autoclave
Vitamin K (menadione)	1 mL	5.8 mM	1 mg/mL stock solution; protect from light; autoclave
FeSO4	1 mL	1.44 mM	0.4 mg FeSO4/mL stock solution; filter sterilize
Histidine Hematin Solution	1 mL	0.001	1.2 mg hematin/mL in 0.2M histidine; filter sterilize after preparation of stock; protect from light; store at 4C
NH4Cl	1 g
Tween 80	2 mL	0.0005
MgSO4-7H20***	1 mL	0.008 mM
ATCC Vitamin Mix***	10 mL	0.01
ATCC Trace Mineral Mix***	10 mL	0.01
For sole C&E media, add one of the following to Media A
Aspartic acid	0.02g
Mannose	0.9g
Galactose	1.8g
Sodium acetate	6g	0.006
Sodium formate	4g	0.004	Requires sodium sulfate
D-glucose	0.4 g	2.2 mM	Add to 10ml DI H2O and filter sterilize
Fructose	1 g	2.2 mM	Add to 10ml DI H2O and filter sterilize
Sucrose	1.71g		Add to 10ml DI H2O and filter sterilize
Methylvaleric acid	561ul		Add both methylvaeric and methylbutyric
Methylbutyric acid	517ul
Oxalate	6.75g	50mM
pH to 7
Filter sterilize and bring into anaerobic chamber
Cysteine	0.5g		Add to 10ml DI H2O and filter sterilize in anaerobic chamber
sodium sulfate	2g	0.002	Only add if adding sodium formate
