# Supplementary material for: Complex system modeling reveals oxalate homeostasis is driven by diverse oxalate-degrading bacteria
Source: eLife. 2025 May 1;14:RP104121. doi: 10.7554/eLife.104121 (PMC12045624; doi:10.7554/eLife.104121)
Supplement: Supplementary file 8. [file elife-104121-supp8.xlsx]

## Sheet: Sheet1
Table S8. Microorganisms used in the taxonomic cohort.
Species	Commercial source	Isolation source
Oxalobacter formgienes	ATCC 35274	human
Desulfovibrio piger	DSMZ749	Sheep rumen
Methanobrevibacter smithii	DSMZ11975	animal feces
Ruminococcus gnavus	ATCC 29149	human
Coprococcus comes	ATCC 27758	human
Bacteroides thetaiotaomicron	ATCC 700349	human
Lactobacillus helveticus	ATCC 55796	Unknown
Lactobacillus plantarum	ATCC 700210	Unknown
